# Supplementary material
Source: publisher figshare collection journal article supplement (https://acs.figshare.com/ndownloader/files/18018185)
Supplement: Supplementary file 1 [file 18018185]

### **Research highlights**

- VLE of Methyl Acetate or Ethyl Acetate with n-Heptane was determined at 1.5 MPa.
- VLE of Methyl Acetate or Ethyl Acetate with 2,2,4-Trimethylpentane at both 0.1 MPa and 1.5 MPa were studied.
- Data were verified with the area test, Van Ness direct test and point-to-point test.
- Data at high pressure were verified by using the Gibbs-Duhem equation.
- VLE data of ester+alkane mixtures are well modeled by PRSV and PC-SAFT EOS.
